# Supplementary material for: Complete suspension culture of human induced pluripotent stem cells supplemented with suppressors of spontaneous differentiation
Source: eLife journal article supplement (doi:10.7554/elife.89724), 2023-12-27
Supplement: fig1-figsupp1-data1 [file elife-89724-fig1-figsupp1-data1-v1.zip]

PAX6-TEZ

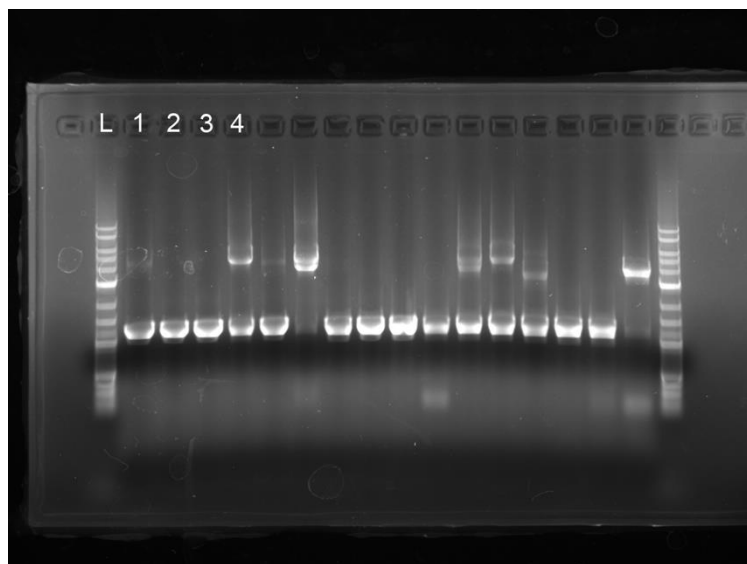

SOX17-TEZ

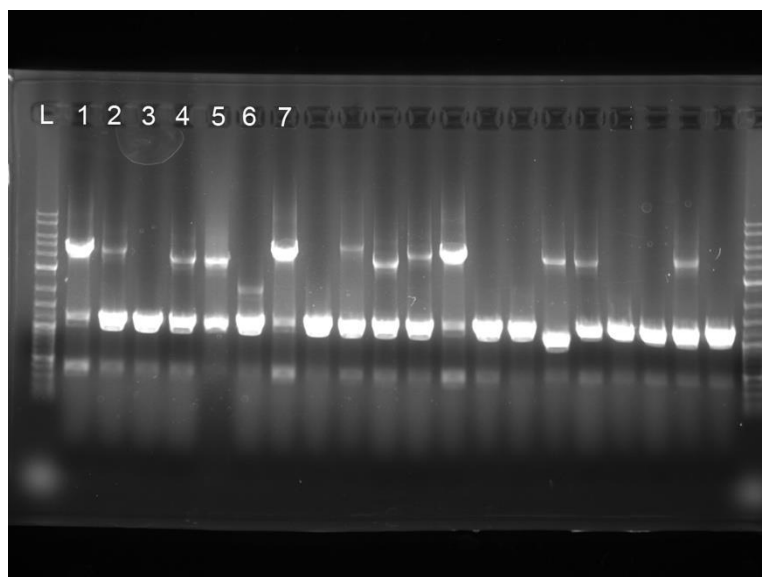

Figure 1—figure supplement 1, Source Data 1.  
Original gel images corresponding to Figure 1—figure supplement 1, panel B.
