# Supplementary material for: Complete suspension culture of human induced pluripotent stem cells supplemented with suppressors of spontaneous differentiation
Source: eLife journal article supplement (doi:10.7554/elife.89724), 2023-12-27
Supplement: fig2-figsupp1-data3 [file elife-89724-fig2-figsupp1-data3-v1.zip]

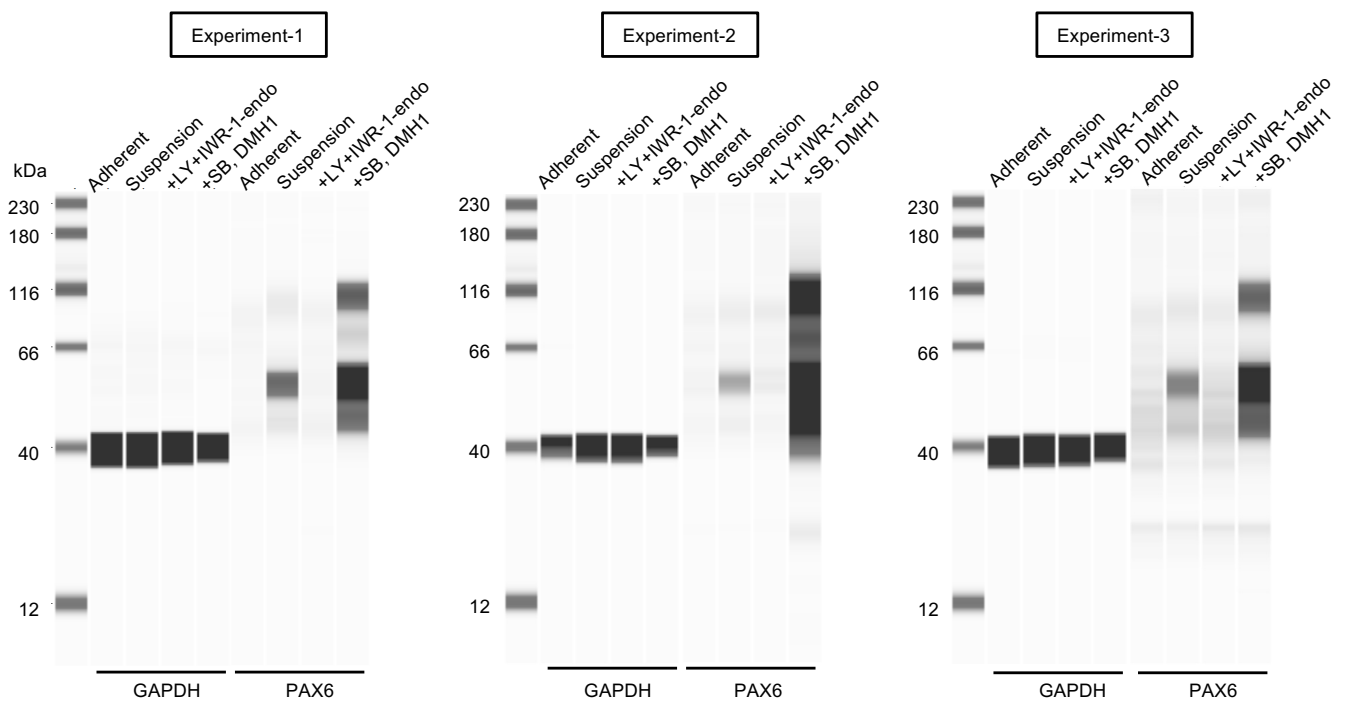

Figure 2—figure supplement 1, Source Data 3. Original automatic capillary western blots (simple western assays) corresponding to Figure 2—figure supplement 1, panel C.
