# Supplementary material for: Complete suspension culture of human induced pluripotent stem cells supplemented with suppressors of spontaneous differentiation
Source: eLife journal article supplement (doi:10.7554/elife.89724), 2023-12-27
Supplement: fig3-figsupp1-data1 [file elife-89724-fig3-figsupp1-data1-v1.zip]

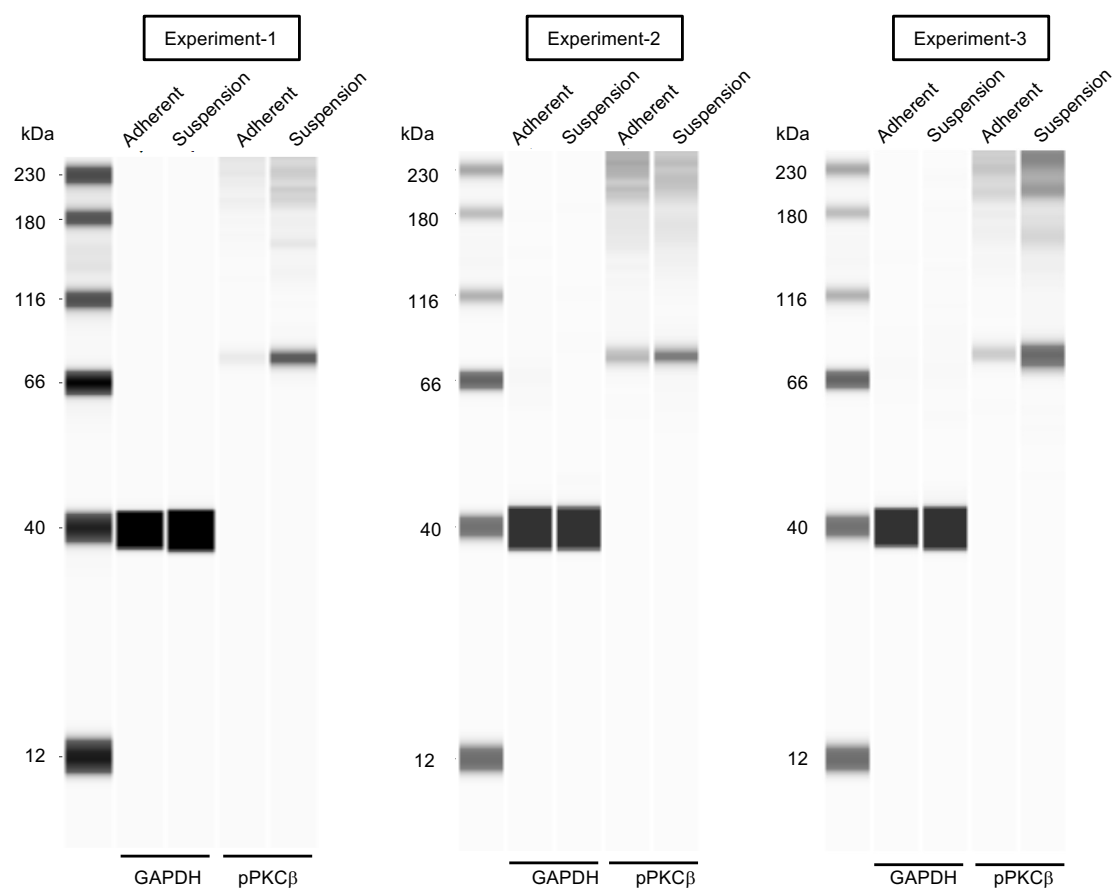

Figure 3—figure supplement 1, Source Data 1. Original automatic capillary western blots (simple western assays) corresponding to Figure 3—figure supplement 1, panel B.
